# Supplementary material
Source: HighWire-hosted journal article supplement (https://nutrition.bmj.com/content/bmjnph-2021-000259)
Supplement: inline-supplementary-material-1 [file inline-supplementary-material-1.pdf]

**Supplementary Table 1:** Summary statistics of the urinary iodine concentrations in the study population, n=48.

| <b>Study group</b> | <b>Median</b> | <b>IQR</b> | <b>Range (min, max)</b> | <b>Mean (µg/L)</b> | <b>95 % CI</b> |
|--------------------|---------------|------------|-------------------------|--------------------|----------------|
| Cases (n = 24)     | 43.9          | 161.8      | < 0.099, 361.2          | 86.6               | 44.4 – 128.8   |
| Controls (n = 24)  | 31.4          | 75.1       | < 0.099, 230.8          | 55.9               | 30.1 – 81.8    |
| Total (n = 48)     | 35.0          | 94.7       | < 0.099, 361.2          | 71.3               | 47.0 – 95.5    |

*Cases = patients with goitre, controls = patients without goitre, IQR = interquartile range, CI = confidence interval.*
